# Supplementary figures and images for: CYLD Inhibits the Development of Skin Squamous Cell Tumors in Immunocompetent Mice
Source: MDPI journal article supplement (doi:10.3390/ijms22136736), 2021-06-23

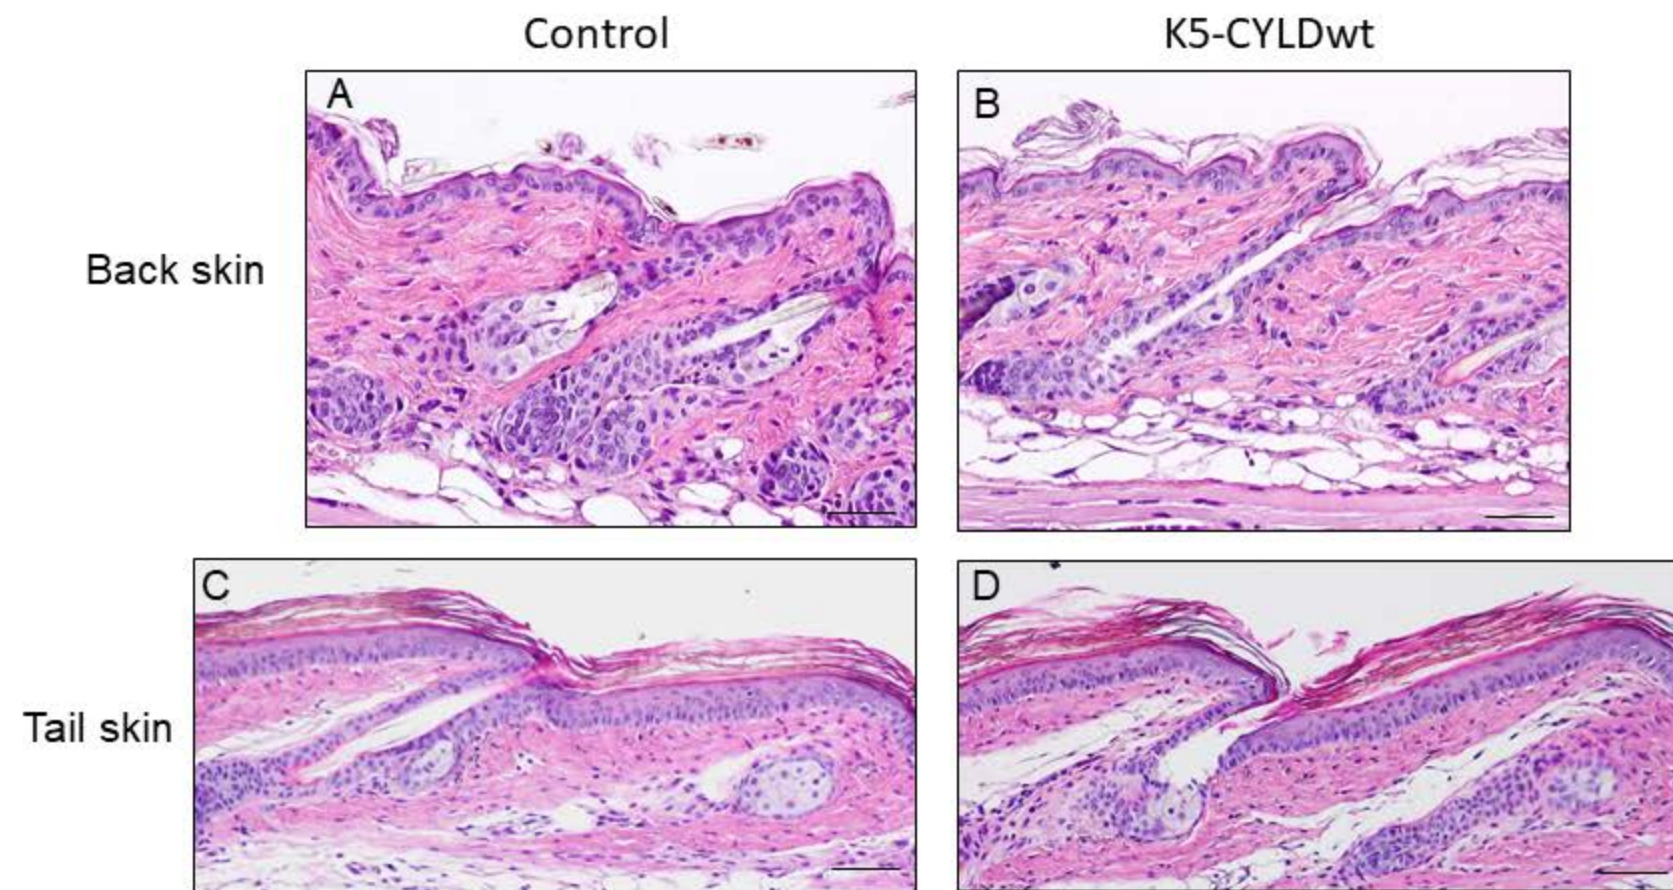

Figure S1

Supplement: s1 [file s1]
